# Supplementary material for: Effects of Recombinant IL-13 Treatment on Gut Microbiota Composition and Functional Recovery after Hemisection Spinal Cord Injury in Mice
Source: MDPI journal article supplement (doi:10.3390/nu15194184), 2023-09-27
Supplement: s1 [file s1]

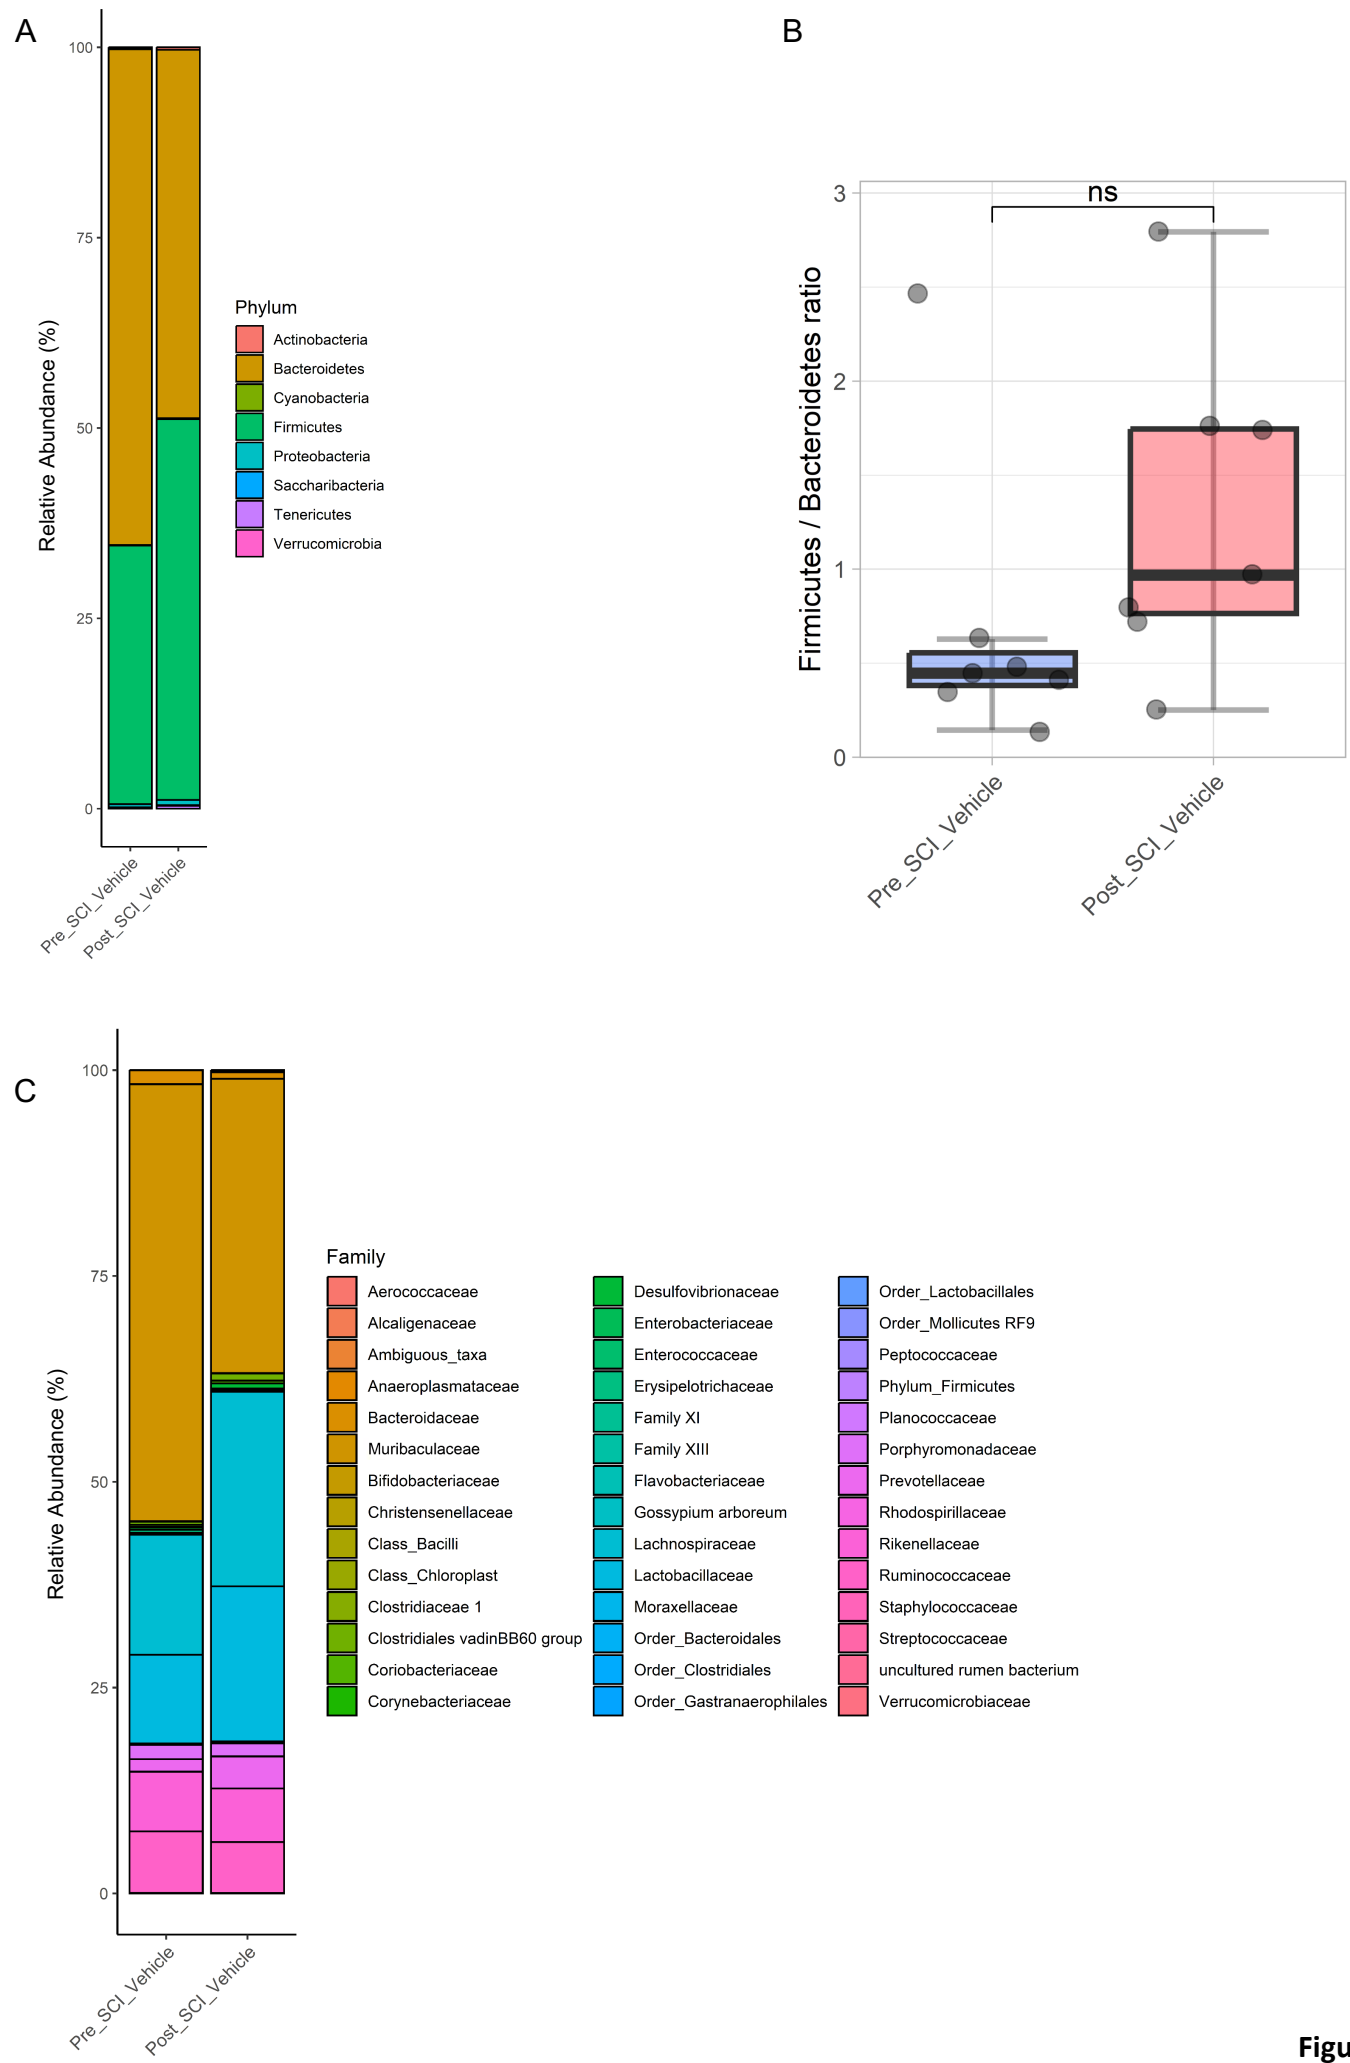

Figure S1

A

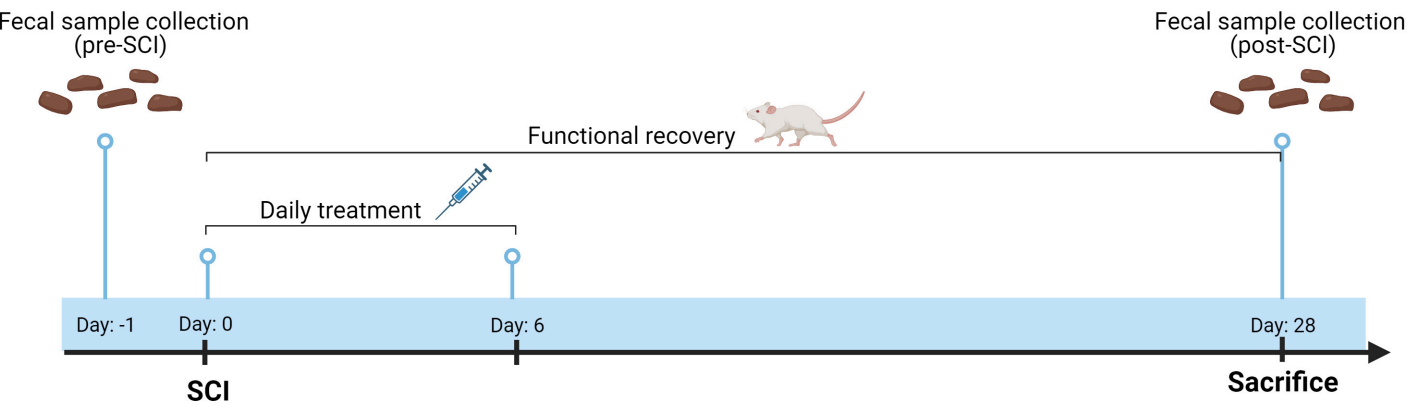

B

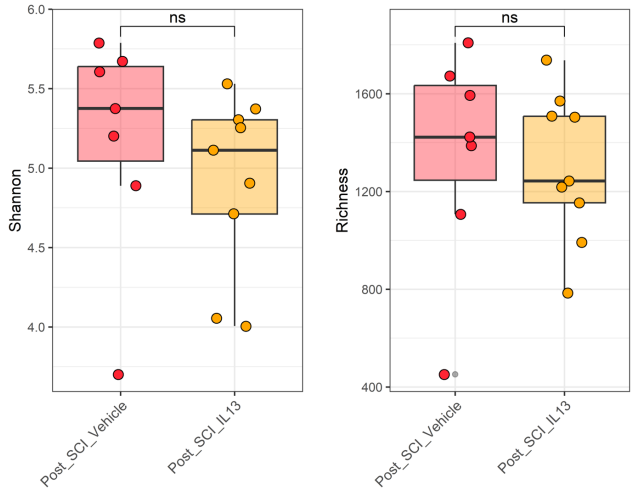

C

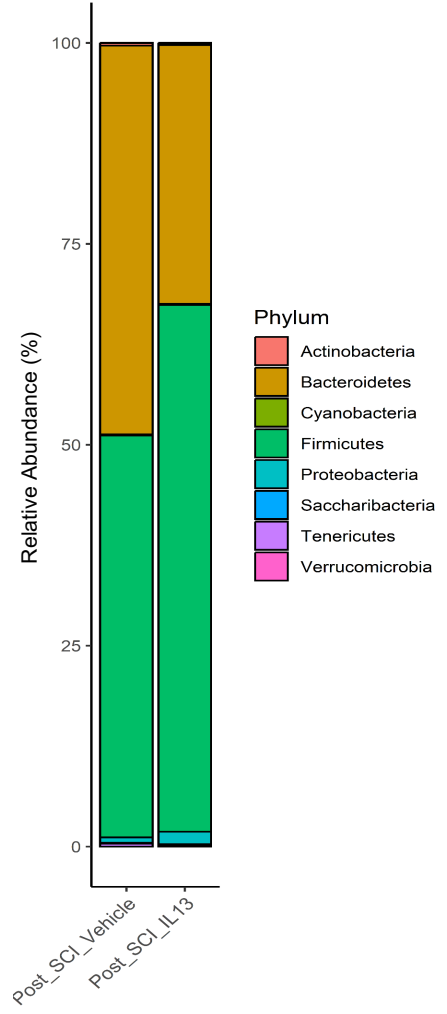

D

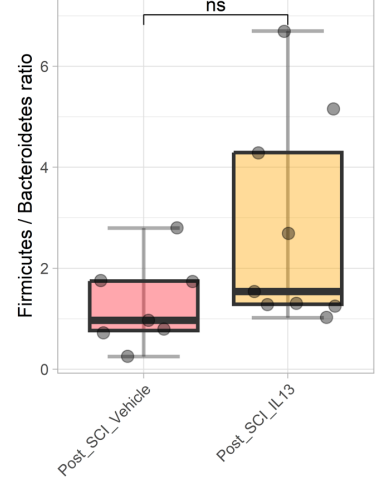

Figure S2

**Table S1.** Acronyms and Abbreviations

| <b>Abbreviation</b> | <b>Definition</b>                                              |
|---------------------|----------------------------------------------------------------|
| ASD                 | Autism Spectrum Disorder                                       |
| BMS                 | Basso Mouse Scale                                              |
| CNS                 | Central Nervous System                                         |
| FDR                 | False Discovery Rate                                           |
| GI                  | Gastrointestinal                                               |
| LDA                 | Linear Discriminant Analysis                                   |
| LEfSe               | Linear Discriminant Analysis Effect Size                       |
| MS                  | Multiple Sclerosis                                             |
| NF $\kappa$ B       | Nuclear factor kappa-light-chain-enhancer of activated B cells |
| OTU                 | Operational Taxonomic Unit                                     |
| PBS                 | Phosphate Buffered Saline                                      |
| PPARs               | Peroxisome Proliferator-Activated Receptors                    |
| rIL-13              | Recombinant Interleukin-13                                     |
| rRNA                | Ribosomal Ribonucleic Acid                                     |
| SCFA                | Short-Chain Fatty Acid                                         |
| SCI                 | Spinal Cord Injury                                             |
| SEM                 | Standard Error of the Mean                                     |
| TLR4                | Toll-Like Receptor 4                                           |
| TNF- $\alpha$       | Tumor Necrosis Factor Alpha                                    |
| WT                  | Wild Type                                                      |
